# Supplementary material
Source: MDPI journal article supplement (https://www.mdpi.com/2073-4395/9/8/424)
Supplement: s1 [file s1]

**Table S1.** Costs of variable inputs, including seed, hopper seed treatments, (inoculant for conventional soybean and SaBrex for organic crops), starter fertilizer, N fertilizer, herbicide, and fungicide in conventional and/or organic soybean in 2017 and 2018, maize in 2017, and wheat in 2018.

| Input              | Conventional                            | Organic        |
|--------------------|-----------------------------------------|----------------|
|                    | \$                                      |                |
|                    | Soybean                                 |                |
| Seed/140,000       | 84.50 (including seed treatment)        | 52.50          |
| Seed Treatment     | 52.25/g (Cell-Tech inoculant)           | 200/g (SaBrex) |
| Herbicide          | 295/L (Glyphosate)                      | -              |
| Fungicide          | 2170/L (Fluxapyroxad + Pyraclostrobin)  | -              |
|                    | Maize                                   |                |
| Seed/80,000        | 335 (including seed treatment)          | 245            |
| Seed Treatment     |                                         | 200/g (SaBrex) |
| Starter Fertilizer | 460/tonne (Mg)                          | 325/tonne (Mg) |
| Side-dress N       | 1.10/kg N                               | 12.76/kg N     |
| Herbicide          | 288/L (Glyphosate)                      |                |
|                    | Wheat                                   |                |
| Seed/bag           | 31 (including seed treatment)           | 24             |
| Seed Treatment     |                                         | 200/g (Sabrex) |
| Starter Fertilizer | 480/tonne (Mg)                          | 330/tonne (Mg) |
| Herbicide          | 276/mL (thifensulfuron + tribenuron)    |                |
| Top-dress N        | 1.09/kg N                               | 13.05/kg N     |
| Fungicide          | 1325/L (Prothioconazole + Tebuconazole) |                |

**Table S2.** Income, selected production costs, and returns above selected production costs for conventional maize with recommended management (M1) and high input management (M2) and organic maize with recommended management (M3) and high input management (M4) in a soybean-wheat/red clover-maize-soybean rotation, and conventional maize with recommended management (M5) and high input management (M6) and organic maize with recommended management (M7) and high input management (M8) in a maize-soybean-maize-soybean rotation at a Cornell University Research Farm in central New York, USA in 2017.

| Production Value, Income                      | Maize Treatments |        |        |        |
|-----------------------------------------------|------------------|--------|--------|--------|
|                                               | M1               | M2     | M3     | M4     |
|                                               | \$/ha            |        |        |        |
| Grain                                         | 1538             | 1670   | 3597   | 4123   |
| <b>Selected Production Costs <sup>1</sup></b> |                  |        |        |        |
| <b>Variable Inputs</b>                        |                  |        |        |        |
| Fertilizers                                   | 188.34           | 237.74 | 115.74 | 483.16 |
| Seeds                                         | 306.16           | 367.19 | 223.91 | 268.54 |
| Sprays & Other Crop Inputs                    | 115.97           | 137.28 | 106.21 | 155.12 |
| Labor                                         | 1.21             | 1.21   | 28.97  | 28.97  |
| Repairs & Maintenance                         |                  |        |        |        |
| Tractor                                       | 0.25             | 0.25   | 7.04   | 7.04   |
| Equipment                                     | 1.16             | 1.16   | 8.74   | 8.74   |
| Fuels & Lubricants                            | 0.67             | 0.67   | 17.73  | 17.73  |
| Interest on Operating Capital                 | 15.34            | 18.65  | 12.72  | 24.23  |
| <b>Total Selected Variable Input Costs</b>    | 629.08           | 764.12 | 521.05 | 993.51 |

|                                               |           |           |           |           |
|-----------------------------------------------|-----------|-----------|-----------|-----------|
| <b>Fixed Inputs</b>                           |           |           |           |           |
| Tractors                                      | 1.73      | 1.73      | 41.69     | 41.69     |
| Equipment                                     | 5.53      | 5.53      | 37.37     | 37.37     |
| <b>Total Selected Fixed Input Costs</b>       | 7.26      | 7.26      | 79.04     | 79.04     |
|                                               |           |           |           |           |
| <b>Total Selected Costs</b>                   | 636.37    | 771.38    | 600.11    | 1072.57   |
| <b>Partial Returns</b>                        | 902       | 899       | 2983      | 3033      |
|                                               |           |           |           |           |
| <b>Production Value, Income</b>               | <b>M5</b> | <b>M6</b> | <b>M7</b> | <b>M8</b> |
| \$ /ha                                        |           |           |           |           |
| Grain                                         | 1600      | 1902      | 3277      | 3821      |
| <b>Selected Production Costs <sup>1</sup></b> |           |           |           |           |
| <b>Variable Inputs</b>                        |           |           |           |           |
| Fertilizers                                   | 237.74    | 299.49    | 850.57    | 1144.50   |
| Seeds                                         | 306.16    | 367.19    | 223.91    | 268.54    |
| Sprays & Other Crop Inputs                    | 119.08    | 136.37    | 123.75    | 136.99    |
| Labor                                         | 1.21      | 1.21      | 28.97     | 28.97     |
| Repairs & Maintenance                         | 0.00      | 0.00      | 0.00      | 0.00      |
| Tractor                                       | 0.25      | 0.25      | 7.04      | 7.04      |
| Equipment                                     | 1.16      | 1.16      | 8.74      | 8.74      |
| Fuels & Lubricants                            | 0.67      | 0.67      | 17.73     | 17.73     |
| Interest on Operating Capital                 | 16.65     | 20.16     | 31.52     | 40.31     |
| <b>Total Selected Variable Input Costs</b>    | 682.91    | 826.49    | 1292.23   | 1652.80   |
| <b>Fixed Inputs</b>                           |           |           |           |           |
| Tractors                                      | 1.73      | 1.73      | 41.69     | 41.69     |
| Equipment                                     | 5.53      | 5.53      | 37.37     | 37.37     |
| <b>Total Selected Fixed Input Costs</b>       | 7.26      | 7.26      | 79.04     | 79.04     |
|                                               |           |           |           |           |
| <b>Total Selected Costs</b>                   | 690.19    | 833.75    | 1371.27   | 1731.87   |
| <b>Returns above Selected Costs</b>           | 910       | 1068      | 1906      | 2089      |

<sup>1</sup> This reporting of costs focused on those costs that differed among the eight maize treatments. Seed costs differed among treatments due to price per unit differences between non-GM and GM hybrids, and seeding rate differences for recommended versus high input management. Spray and other crop inputs that differed included pest and disease management materials, and hauling as a function of yield. Labor costs reported included only those attributed to spray applications for treatments M1, M2, M5, and M6, and those attributed to weeding tasks for M3, M4, M7, and M8. Labor costs reported do not include labor associated with tillage, planting and harvesting tasks considered constant, not differing among treatments. Similar explanations underlie estimates for the remaining cost items that differ.

**Table S3.** Income, selected production costs, and returns above selected production costs for conventional soybean with recommended management (S1) and high input management (S2); and organic soybean with recommended management (S3) and high input management (S4) at a Cornell University Research Farm in central New York, USA in 2017.

| Production Value, Income                     | Soybean Treatments |        |        |        |
|----------------------------------------------|--------------------|--------|--------|--------|
|                                              | S1                 | S2     | S3     | S4     |
|                                              | \$ /ha             |        |        |        |
| Seed                                         | 1353               | 1397   | 2252   | 2314   |
| <b>Selected Production Costs<sup>1</sup></b> |                    |        |        |        |
| <b>Variable Inputs</b>                       |                    |        |        |        |
| Fertilizers                                  |                    |        |        |        |
| Seeds                                        | 222.30             | 296.40 | 137.60 | 183.50 |
| Sprays & Other Crop Inputs                   | 33.57              | 80.65  | 10.20  | 35.74  |
| Labor                                        | 1.16               | 2.35   | 32.16  | 32.16  |
| Repairs & Maintenance                        |                    |        |        |        |
| Tractor                                      | 0.25               | 0.47   | 8.42   | 8.42   |
| Equipment                                    | 1.19               | 2.35   | 10.47  | 10.47  |
| Fuels & Lubricants                           | 0.67               | 1.36   | 21.02  | 21.02  |
| Interest on Operating Capital                | 6.47               | 9.58   | 5.51   | 7.29   |
| <b>Total Selected Variable Input Costs</b>   | 265.60             | 393.15 | 225.39 | 298.57 |
| <b>Fixed Inputs</b>                          |                    |        |        |        |
| Tractors                                     | 1.73               | 3.48   | 49.77  | 49.77  |
| Equipment                                    | 5.61               | 11.21  | 44.48  | 44.48  |
| <b>Total Selected Fixed Input Costs</b>      | 7.34               | 14.70  | 94.26  | 94.26  |
| <b>Total Selected Costs</b>                  | 272.94             | 407.85 | 319.64 | 392.83 |
| <b>Returns above Selected Costs</b>          | 1080               | 989    | 1932   | 1921   |

<sup>1</sup> See Table S2 for an explanation of selected production costs.

**Table S4.** Income, selected production costs, and returns above selected production costs for conventional wheat with recommended management (W1) and high input management (W2); and organic soybean with recommended management (W3) and high input management (W4) at a Cornell University Research Farm in central New York, USA in 2018.

| Production Value, Income                     | Wheat Treatments |        |        |         |
|----------------------------------------------|------------------|--------|--------|---------|
|                                              | W1               | W2     | W3     | W4      |
|                                              | \$ /ha           |        |        |         |
| Seed                                         | 935              | 927    | 1438   | 1547    |
| <b>Selected Production Costs<sup>1</sup></b> |                  |        |        |         |
| <b>Variable Inputs</b>                       |                  |        |        |         |
| Fertilizers                                  | 192.66           | 229.71 | 616.86 | 803.79  |
| Seeds                                        | 150.62           | 213.38 | 116.61 | 165.22  |
| Sprays & Other Crop Inputs                   | 46.24            | 137.06 | 46.24  | 92.08   |
| Labor                                        | 0.00             | 2.25   | 0.00   | 0.00    |
| Repairs & Maintenance                        |                  |        |        |         |
| Tractor                                      | 0.00             | 0.44   | 0.00   | 0.00    |
| Equipment                                    | 0.00             | 2.32   | 0.00   | 0.00    |
| Fuels & Lubricants                           | 0.00             | 1.85   | 0.00   | 0.00    |
| Interest on Operating Capital                | 9.73             | 14.67  | 19.49  | 26.53   |
| <b>Total Selected Variable Input Costs</b>   | 399.25           | 601.72 | 799.19 | 1087.62 |
| <b>Fixed Inputs</b>                          |                  |        |        |         |
| Tractors                                     | 0.00             | 3.29   | 0.00   | 0.00    |
| Equipment                                    | 0.00             | 11.02  | 0.00   | 0.00    |
| <b>Total Selected Fixed Input Costs</b>      | 0.00             | 14.30  | 0.00   | 0.00    |
| <b>Total Selected Costs</b>                  | 399.25           | 616.02 | 799.19 | 1087.62 |
| <b>Returns above Selected Costs</b>          | 536              | 311    | 639    | 459     |

<sup>1</sup> See Table S2 for an explanation of selected production costs.
